# Supplementary material
Source: PubMed Central journal article supplement (PMC6069211)
Supplement: JVI.00323-18_zjv016183757s1.pdf [file JVI.00323-18_zjv016183757s1.pdf]

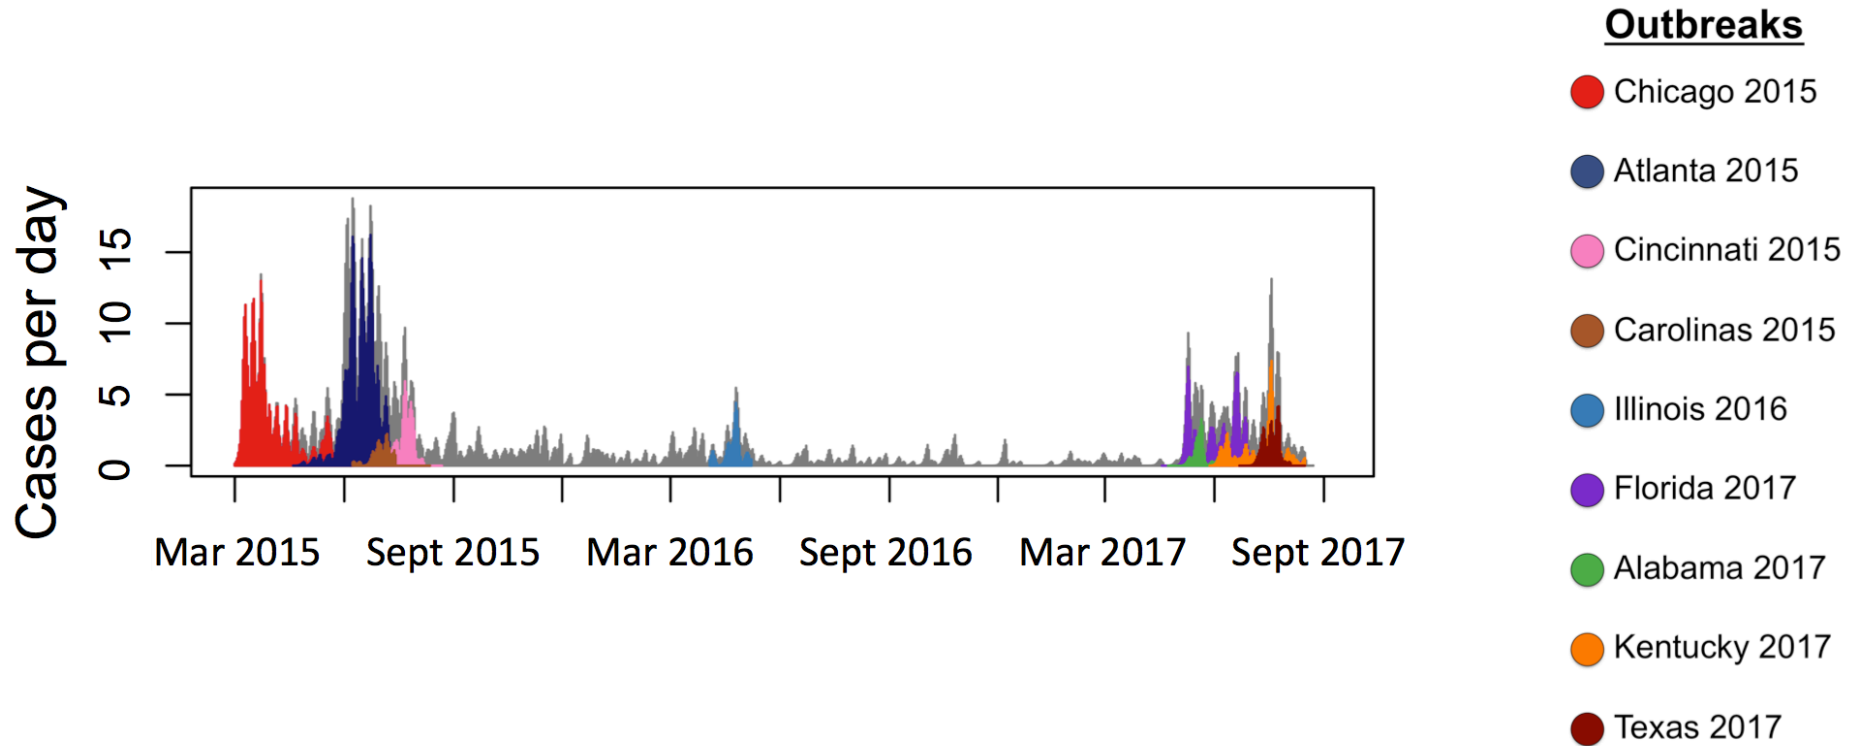

**Figure S1.** Histogram of all cases of H3N2 CIV in the USA reported per day (black bars) sub-colored by epidemiological outbreak.

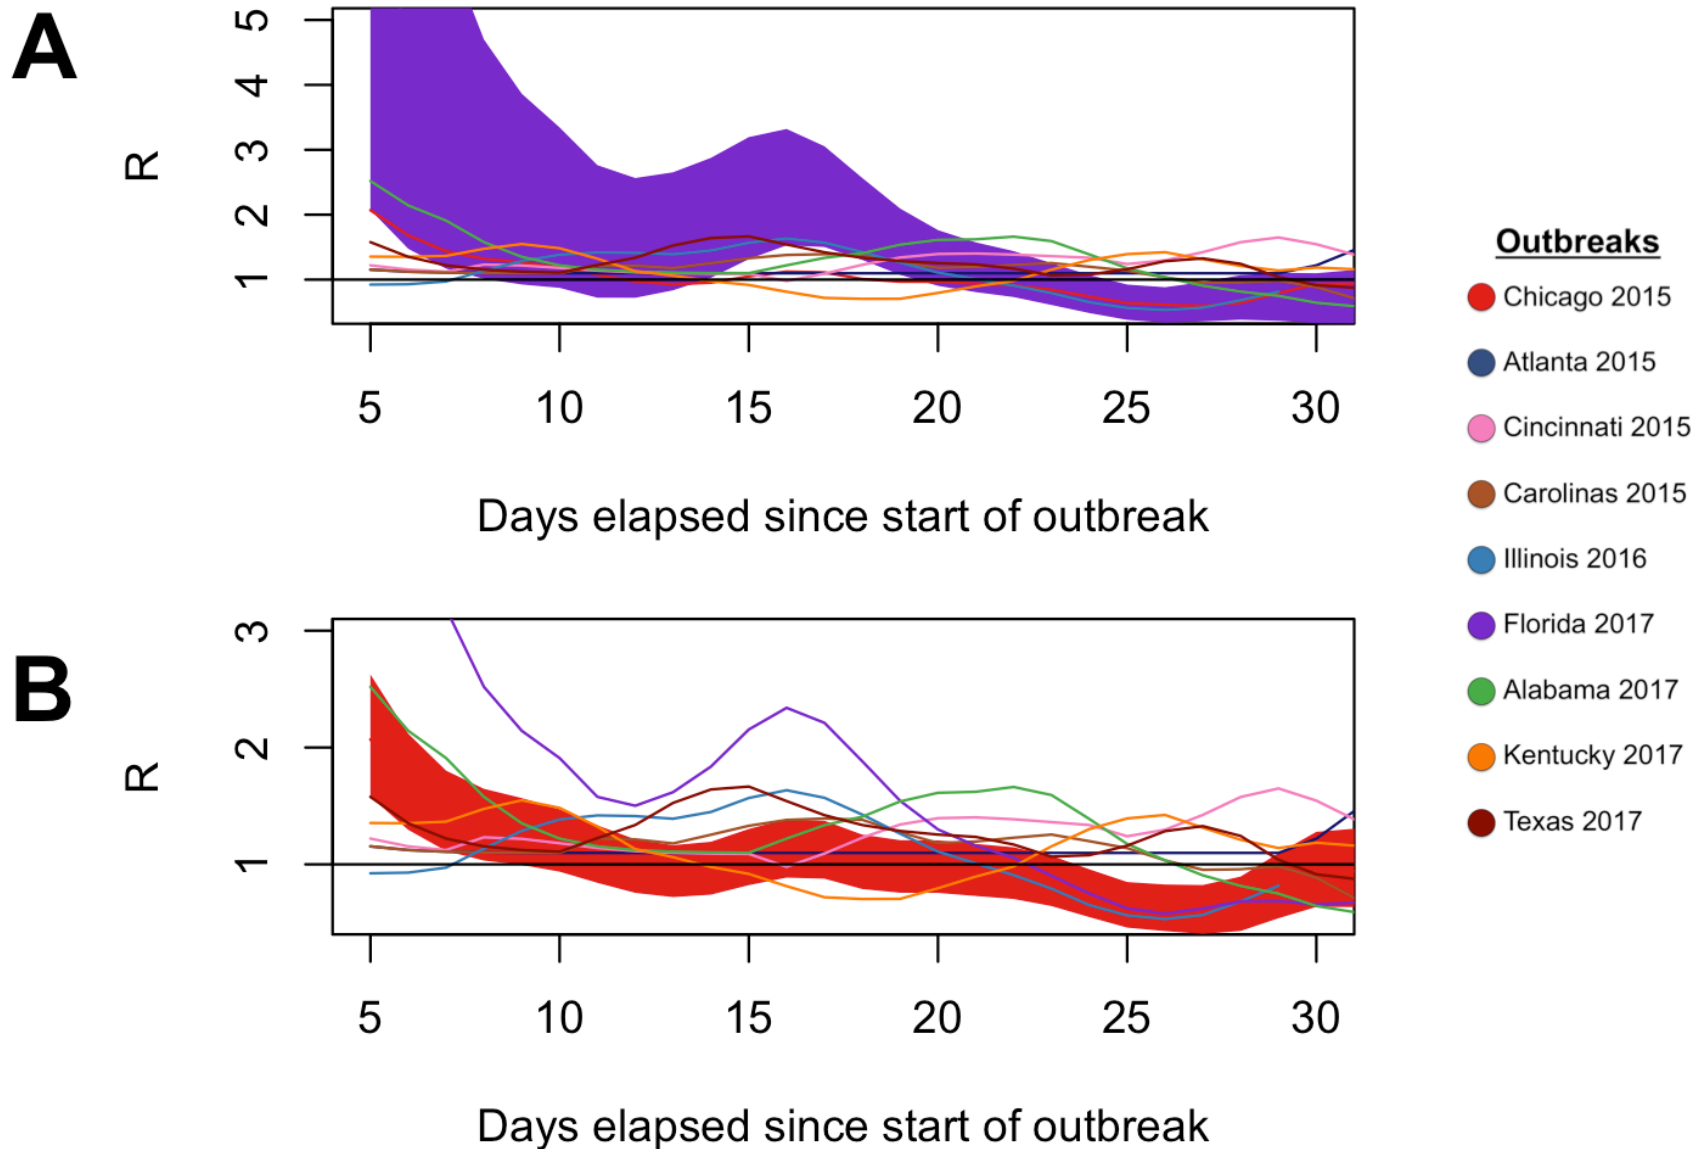

**Figure S2.** Estimates of the variation in the rate of transmission over the course of each outbreak with 95% confidence intervals represented as shaded region for (A) Florida 2017 and (B) Chicago 2015 outbreaks.

**Video S1.** Animated version of the data shown in Figure 5, with the cases each day of the epidemic being shown on the map of the USA, as well as shown for their ZIP code (Lower panel), where blue marks are samples that were tested negative, and the red/yellow marks indicate positive tests.
